CORRECTION

# Correction: The Release Rate of Environmental DNA from Juvenile and Adult Fish

Atsushi Maruyama, Keisuke Nakamura, Hiroki Yamanaka, Michio Kondoh, Toshifumi Minamoto

There is an error in Table 1. The correct  $N_0$  and  $\beta$  values for the fifth individual (corresponding to the blue individual in Fig 1) are  $2.81 \pm 0.37^{***}$  and  $0.039 \pm 0.015^*$ , respectively. Please see the corrected Table 1 here.

**Table 1. Initial eDNA concentration and degradation constant ( $N_0$  and  $\beta$  respectively;  $\pm$  SE) estimated by non-linear models fitted to the change in the eDNA concentration after fish removal and fish body wet weight.**

| $N_0$ ( $\times 10^7$ l <sup>-1</sup> ) | $\beta$ (h <sup>-1</sup> ) | Weight (g) |
|-----------------------------------------|----------------------------|------------|
| $3.45 \pm 0.29^{***}$                   | $0.116 \pm 0.020^{**}$     | 0.858      |
| $5.84 \pm 0.79^{***}$                   | $0.132 \pm 0.041^*$        | 1.074      |
| $1.31 \pm 0.14^{***}$                   | $0.159 \pm 0.039^{**}$     | 1.529      |
| $1.62 \pm 0.11^{***}$                   | $0.051 \pm 0.010^{**}$     | 30.094     |
| $2.81 \pm 0.37^{***}$                   | $0.039 \pm 0.015^*$        | 52.466     |

Significance levels (t-test) are indicated by \*\*\* (p<0.001), \*\* (p<0.01) and \* (p<0.05)

<https://doi.org/10.1371/journal.pone.0212145.t001>

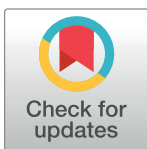

As a result of this error, the following sentences should be corrected in the article:

- There is an error in the penultimate sentence of the Abstract section. The correct sentence is: eDNA degradation rates (copies l<sup>-1</sup> h<sup>-1</sup>), calculated by curve fitting of time-dependent changes in eDNA concentrations after fish removal, were 3.9–15.9% per hour (half-life: 7.0 h).
- In the Results, there are errors in the second and third sentences of the “eDNA degradation” subsection. The correct sentences are: All non-linear model fittings were statistically significant and the  $N_0$  and  $\beta$  values were calculated as  $3.01 \times 10^7 \pm 1.81 \times 10^7$  l<sup>-1</sup> (mean  $\pm$  SD,  $n = 5$ ) and  $0.099 \pm 0.052$  h<sup>-1</sup>, respectively (Table 1 and Fig 1). Using the mean  $\beta$  value, the eDNA degradation rate (copies l<sup>-1</sup> h<sup>-1</sup>) can be estimated by Equation (2) as follows:

$$\frac{dN}{dt} = -0.099 \times N$$

and the eDNA half-life was calculated by Equation (3) to be 7.0 h.

- In the Discussion, there is an error in the second sentence of the first paragraph of the “eDNA degradation” subsection. The correct sentence is: Our non-linear model fitting showed a 3.9–15.9% reduction in eDNA concentration per hour (Table 1 and Fig 1).

**OPEN ACCESS**

**Citation:** Maruyama A, Nakamura K, Yamanaka H, Kondoh M, Minamoto T (2019) Correction: The Release Rate of Environmental DNA from Juvenile and Adult Fish. PLoS ONE 14(2): e0212145. <https://doi.org/10.1371/journal.pone.0212145>

**Published:** February 5, 2019

**Copyright:** © 2019 Maruyama et al. This is an open access article distributed under the terms of the [Creative Commons Attribution License](https://creativecommons.org/licenses/by/4.0/), which permits unrestricted use, distribution, and reproduction in any medium, provided the original author and source are credited.

- In the Discussion, there is an error in the first sentence of the second paragraph of the “eDNA degradation” subsection. The correct sentence is: The eDNA half-life was calculated to be 7.0 h, which indicates that more than 90% of eDNA copies degraded within 24 hours.

In addition, as a result of the errors in [Table 1](#), there are errors in [Fig 3](#). Please see the corrected [Fig 3](#) here.

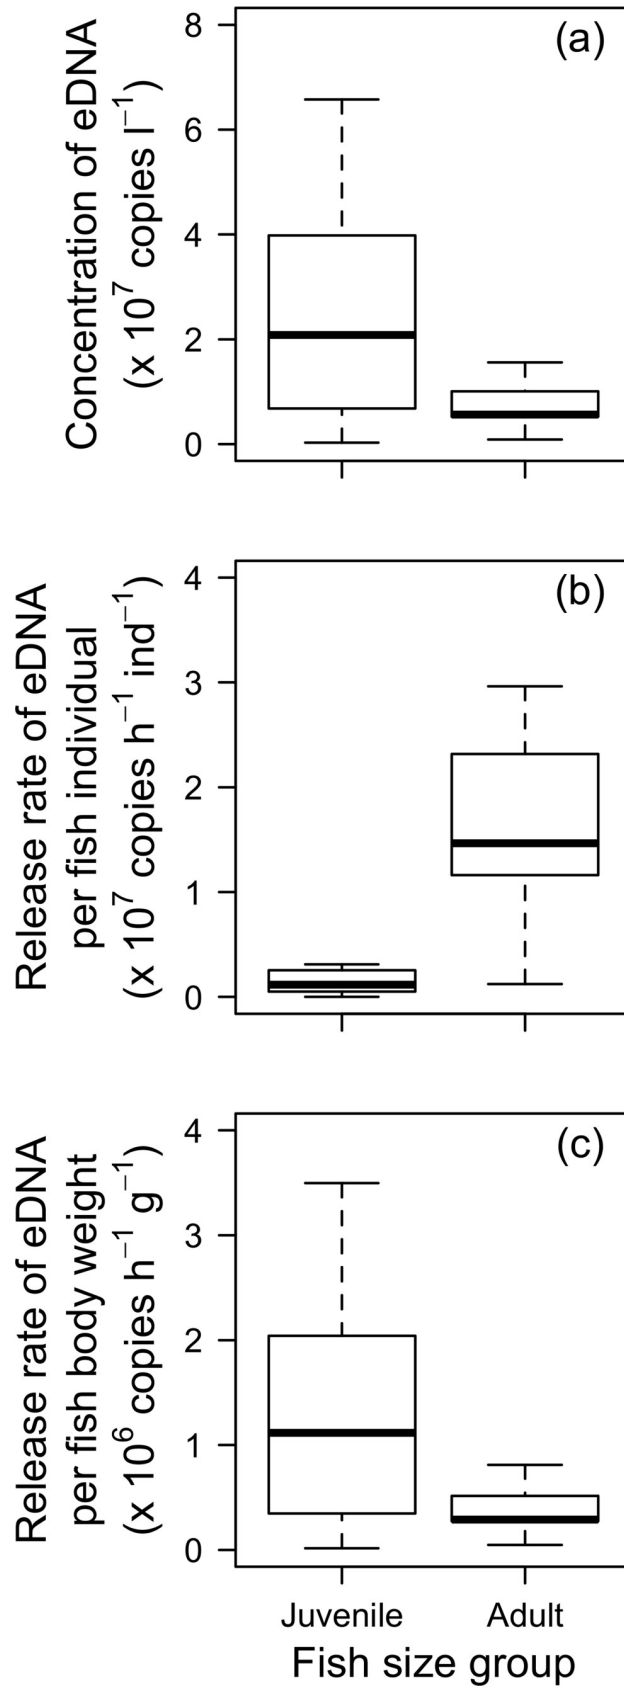

**Fig 3. Box plots of the eDNA release compared between juvenile and adult groups.** a) Stabilized concentration, b) release rate per individual fish, and c) per fish body weight. Body wet weight was 0.5–2.0 g ( $n = 10$ ) and 30–75 g ( $n = 9$ ), respectively.

<https://doi.org/10.1371/journal.pone.0212145.g001>

## Reference

1. Maruyama A, Nakamura K, Yamanaka H, Kondoh M, Minamoto T (2014) The Release Rate of Environmental DNA from Juvenile and Adult Fish. PLoS ONE 9(12): e114639. <https://doi.org/10.1371/journal.pone.0114639> PMID: [25479160](https://pubmed.ncbi.nlm.nih.gov/25479160/)
